# Supplementary material for: The Influence of Diet and Sex on the Gut Microbiota of Lean and Obese JCR:LA-cp Rats
Source: MDPI journal article supplement (doi:10.3390/microorganisms9051037), 2021-05-12
Supplement: s1 [file s1]

## Supplementary Materials

**Table S1.** The following table summarizes the total number of quality filtered per sample.

| <b>MBI.Sample.ID</b> | <b>Your.Sample.ID</b> | <b>Gender</b> | <b>Diet</b> | <b>Genotype</b> | <b>Reads</b> |
|----------------------|-----------------------|---------------|-------------|-----------------|--------------|
| S009I-0001           | 18RAT0332             | Male          | a           | Lean            | 46996        |
| S009I-0002           | 18RAT0333             | Male          | a           | Lean            | 46970        |
| S009I-0003           | 18RAT0334             | Male          | b           | Lean            | 47331        |
| S009I-0004           | 18RAT0335             | Male          | b           | Lean            | 64317        |
| S009I-0005           | 18RAT0336             | Male          | c           | Lean            | 121214       |
| S009I-0006           | 18RAT0342             | Male          | c           | Lean            | 45156        |
| S009I-0007           | 18RAT0343             | Male          | d           | Lean            | 40887        |
| S009I-0008           | 18RAT0344             | Male          | d           | Lean            | 53398        |
| S009I-0009           | 18RAT0374             | Female        | a           | Lean            | 36497        |
| S009I-0010           | 18RAT0375             | Female        | a           | Lean            | 43897        |
| S009I-0011           | 18RAT0376             | Female        | b           | Lean            | 64576        |
| S009I-0012           | 18RAT0377             | Female        | b           | Lean            | 46379        |
| S009I-0013           | 18RAT0378             | Female        | c           | Lean            | 38456        |
| S009I-0014           | 18RAT0340             | Female        | c           | Lean            | 111155       |
| S009I-0015           | 18RAT0379             | Female        | d           | Lean            | 295          |
| S009I-0016           | 18RAT0380             | Female        | d           | Lean            | 476          |
| S009I-0017           | 18RAT0368             | Female        | a           | Obese           | 72357        |
| S009I-0018           | 18RAT0369             | Female        | a           | Obese           | 39223        |
| S009I-0019           | 18RAT0370             | Female        | b           | Obese           | 71309        |
| S009I-0020           | 18RAT0371             | Female        | b           | Obese           | 58457        |
| S009I-0021           | 18RAT0349             | Female        | c           | Obese           | 62259        |
| S009I-0022           | 18RAT0372             | Female        | c           | Obese           | 119694       |

|            |           |        |   |       |       |
|------------|-----------|--------|---|-------|-------|
| S009I-0023 | 18RAT0338 | Female | d | Obese | 43180 |
| S009I-0024 | 18RAT0373 | Female | d | Obese | 61395 |
| S009I-0025 | 18RAT0361 | Male   | a | Obese | 34628 |
| S009I-0026 | 18RAT0362 | Male   | b | Obese | 44626 |
| S009I-0027 | 18RAT0363 | Male   | b | Obese | 49870 |
| S009I-0028 | 18RAT0364 | Male   | c | Obese | 48761 |
| S009I-0029 | 18RAT0365 | Male   | c | Obese | 74299 |
| S009I-0030 | 18RAT0366 | Male   | d | Obese | 69412 |
| S009I-0031 | 18RAT0367 | Male   | d | Obese | 45537 |
| S009I-0032 | 18RAT0457 | Male   | a | Obese | 49357 |
| S009I-0033 | 18RAT0458 | Male   | a | Obese | 58006 |
| S009I-0034 | 18RAT0459 | Male   | b | Obese | 49958 |
| S009I-0035 | 18RAT0460 | Male   | b | Obese | 62540 |
| S009I-0036 | 18RAT0461 | Male   | c | Obese | 57154 |
| S009I-0037 | 18RAT0462 | Male   | c | Obese | 36024 |
| S009I-0038 | 18RAT0463 | Male   | d | Obese | 44141 |
| S009I-0039 | 18RAT0464 | Male   | d | Obese | 44086 |
| S009I-0040 | 18RAT0473 | Female | a | Obese | 38391 |
| S009I-0041 | 18RAT0474 | Female | a | Obese | 45537 |
| S009I-0042 | 18RAT0475 | Female | b | Obese | 76892 |
| S009I-0043 | 18RAT0476 | Female | b | Obese | 40121 |
| S009I-0044 | 18RAT0477 | Female | c | Obese | 47726 |
| S009I-0045 | 18RAT0478 | Female | c | Obese | 55052 |
| S009I-0046 | 18RAT0479 | Female | d | Obese | 39949 |
| S009I-0047 | 18RAT0480 | Female | d | Obese | 48613 |
| S009I-0048 | 18RAT0465 | Male   | a | Lean  | 34428 |
| S009I-0049 | 18RAT0466 | Male   | a | Lean  | 46229 |

|            |           |        |   |      |       |
|------------|-----------|--------|---|------|-------|
| S009I-0050 | 18RAT0467 | Male   | b | Lean | 67566 |
| S009I-0051 | 18RAT0468 | Male   | b | Lean | 53819 |
| S009I-0052 | 18RAT0469 | Male   | c | Lean | 51454 |
| S009I-0053 | 18RAT0470 | Male   | c | Lean | 34605 |
| S009I-0054 | 18RAT0471 | Male   | d | Lean | 39420 |
| S009I-0055 | 18RAT0472 | Male   | d | Lean | 35997 |
| S009I-0056 | 18RAT0481 | Female | a | Lean | 38414 |
| S009I-0057 | 18RAT0482 | Female | a | Lean | 42739 |
| S009I-0058 | 18RAT0483 | Female | b | Lean | 53222 |
| S009I-0059 | 18RAT0484 | Female | b | Lean | 32490 |
| S009I-0060 | 18RAT0485 | Female | c | Lean | 25061 |
| S009I-0061 | 18RAT0486 | Female | c | Lean | 59087 |
| S009I-0062 | 18RAT0487 | Female | d | Lean | 24349 |
| S009I-0063 | 18RAT0488 | Female | d | Lean | 63114 |
| S009I-0064 | 18RAT0577 | Male   | a | Lean | 33327 |
| S009I-0065 | 18RAT0578 | Male   | a | Lean | 33901 |
| S009I-0066 | 18RAT0579 | Male   | b | Lean | 47605 |
| S009I-0067 | 18RAT0580 | Male   | b | Lean | 32401 |
| S009I-0068 | 18RAT0581 | Male   | c | Lean | 39235 |
| S009I-0069 | 18RAT0582 | Male   | c | Lean | 34413 |
| S009I-0070 | 18RAT0583 | Male   | d | Lean | 46679 |
| S009I-0071 | 18RAT0584 | Male   | d | Lean | 51561 |
| S009I-0072 | 18RAT0585 | Female | a | Lean | 41575 |
| S009I-0073 | 18RAT0586 | Female | a | Lean | 57420 |
| S009I-0074 | 18RAT0587 | Female | b | Lean | 37787 |
| S009I-0075 | 18RAT0588 | Female | b | Lean | 41538 |
| S009I-0076 | 18RAT0589 | Female | c | Lean | 37273 |

|            |           |        |   |       |       |
|------------|-----------|--------|---|-------|-------|
| S009I-0077 | 18RAT0590 | Female | c | Lean  | 45098 |
| S009I-0078 | 18RAT0591 | Female | d | Lean  | 25800 |
| S009I-0079 | 18RAT0592 | Female | d | Lean  | 27801 |
| S009I-0080 | 18RAT0593 | Female | a | Obese | 37291 |
| S009I-0081 | 18RAT0594 | Female | a | Obese | 54322 |
| S009I-0082 | 18RAT0595 | Female | b | Obese | 36322 |
| S009I-0083 | 18RAT0596 | Female | b | Obese | 48821 |
| S009I-0084 | 18RAT0597 | Female | c | Obese | 33257 |
| S009I-0085 | 18RAT0598 | Female | c | Obese | 48447 |
| S009I-0086 | 18RAT0599 | Female | d | Obese | 35870 |
| S009I-0087 | 18RAT0600 | Female | d | Obese | 43832 |
| S009I-0088 | 18RAT0601 | Male   | a | Obese | 27070 |
| S009I-0089 | 18RAT0602 | Male   | a | Obese | 51474 |
| S009I-0090 | 18RAT0603 | Male   | b | Obese | 30849 |
| S009I-0091 | 18RAT0604 | Male   | b | Obese | 28819 |
| S009I-0092 | 18RAT0605 | Male   | c | Obese | 38415 |
| S009I-0093 | 18RAT0606 | Male   | c | Obese | 38112 |
| S009I-0094 | 18RAT0607 | Male   | d | Obese | 23994 |
| S009I-0095 | 18RAT0608 | Male   | d | Obese | 40231 |
| S009I-0096 | 18RAT0658 | Male   | a | Lean  | 45504 |
| S009I-0097 | 18RAT0659 | Male   | a | Lean  | 56335 |
| S009I-0098 | 18RAT0660 | Male   | b | Lean  | 33367 |
| S009I-0099 | 18RAT0661 | Male   | b | Lean  | 35225 |
| S009I-0100 | 18RAT0662 | Male   | c | Lean  | 31691 |
| S009I-0101 | 18RAT0663 | Male   | c | Lean  | 38992 |
| S009I-0102 | 18RAT0664 | Male   | d | Lean  | 30233 |
| S009I-0103 | 18RAT0665 | Male   | d | Lean  | 25554 |

|            |           |        |   |       |       |
|------------|-----------|--------|---|-------|-------|
| S009I-0104 | 18RAT0666 | Female | a | Lean  | 25446 |
| S009I-0105 | 18RAT0667 | Female | a | Lean  | 29319 |
| S009I-0106 | 18RAT0668 | Female | b | Lean  | 23419 |
| S009I-0107 | 18RAT0669 | Female | b | Lean  | 36539 |
| S009I-0108 | 18RAT0670 | Female | c | Lean  | 38714 |
| S009I-0109 | 18RAT0671 | Female | c | Lean  | 42667 |
| S009I-0110 | 18RAT0672 | Female | d | Lean  | 50083 |
| S009I-0111 | 18RAT0673 | Female | d | Lean  | 63589 |
| S009I-0112 | 18RAT0682 | Male   | a | Obese | 29011 |
| S009I-0113 | 18RAT0683 | Male   | a | Obese | 52564 |
| S009I-0114 | 18RAT0684 | Male   | b | Obese | 36651 |
| S009I-0115 | 18RAT0685 | Male   | b | Obese | 31486 |
| S009I-0116 | 18RAT0686 | Male   | c | Obese | 22412 |
| S009I-0117 | 18RAT0687 | Male   | c | Obese | 30902 |
| S009I-0118 | 18RAT0688 | Male   | d | Obese | 22971 |
| S009I-0119 | 18RAT0689 | Male   | d | Obese | 32108 |
| S009I-0120 | 18RAT0674 | Female | a | Obese | 23046 |
| S009I-0121 | 18RAT0675 | Female | a | Obese | 49098 |
| S009I-0122 | 18RAT0676 | Female | b | Obese | 29370 |
| S009I-0123 | 18RAT0677 | Female | b | Obese | 42692 |
| S009I-0124 | 18RAT0678 | Female | c | Obese | 37471 |
| S009I-0125 | 18RAT0679 | Female | c | Obese | 40234 |
| S009I-0126 | 18RAT0680 | Female | d | Obese | 53150 |
| S009I-0127 | 18RAT0681 | Female | d | Obese | 62214 |

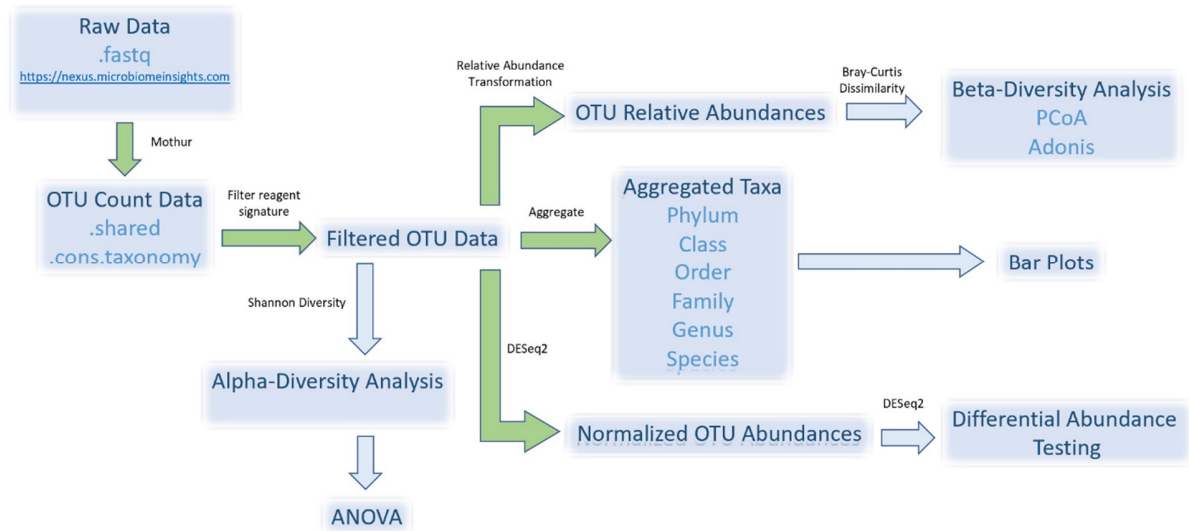

**Figure S1. Analytical flowchart describing data processing and analysis.**

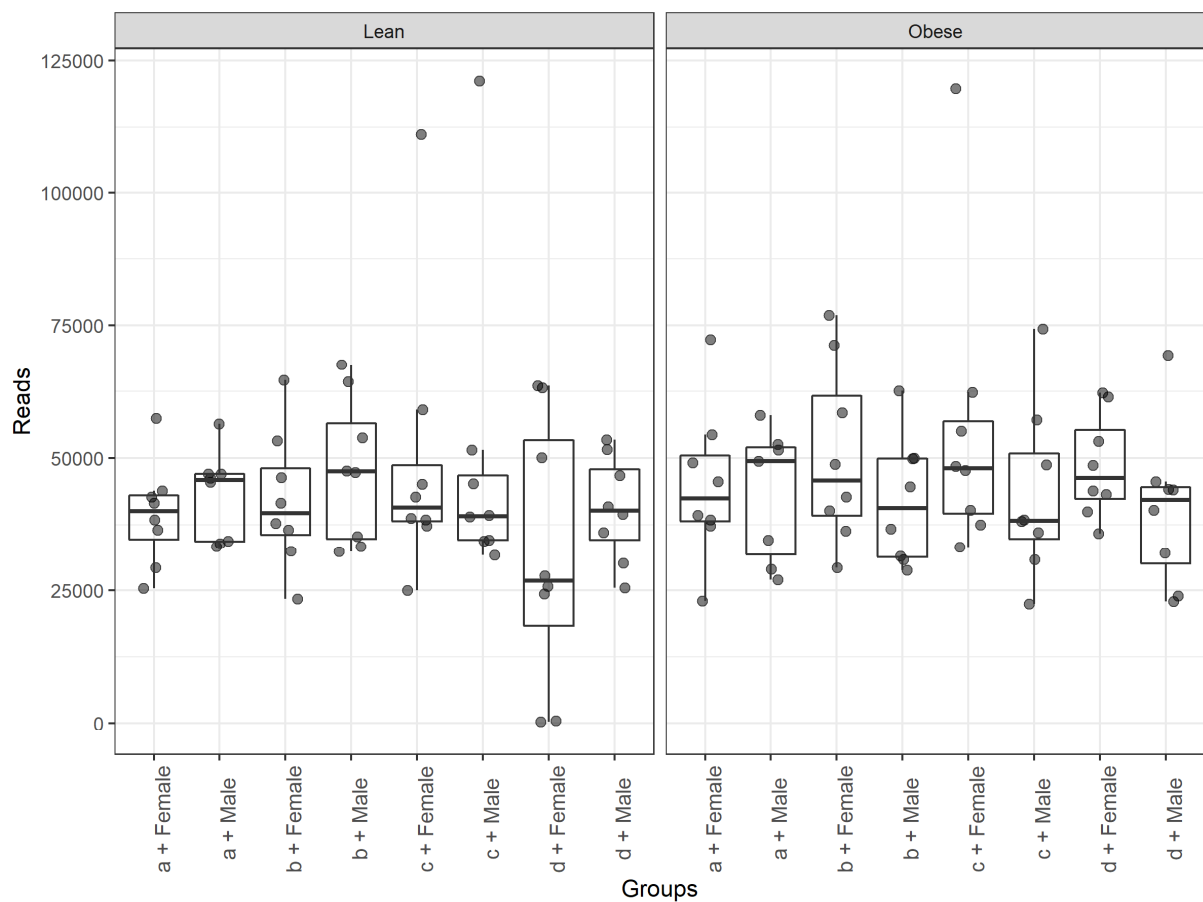

**Figure S2. The box-and-whisker plot illustrates the total number of quality filtered per sample. These reads reflect the total number of high-quality sequences that align with 16Sv4,**

clustered into OTUs and were assigned taxonomic classification. Any ambiguous or low-quality data were discarded from the subsequent analyses.

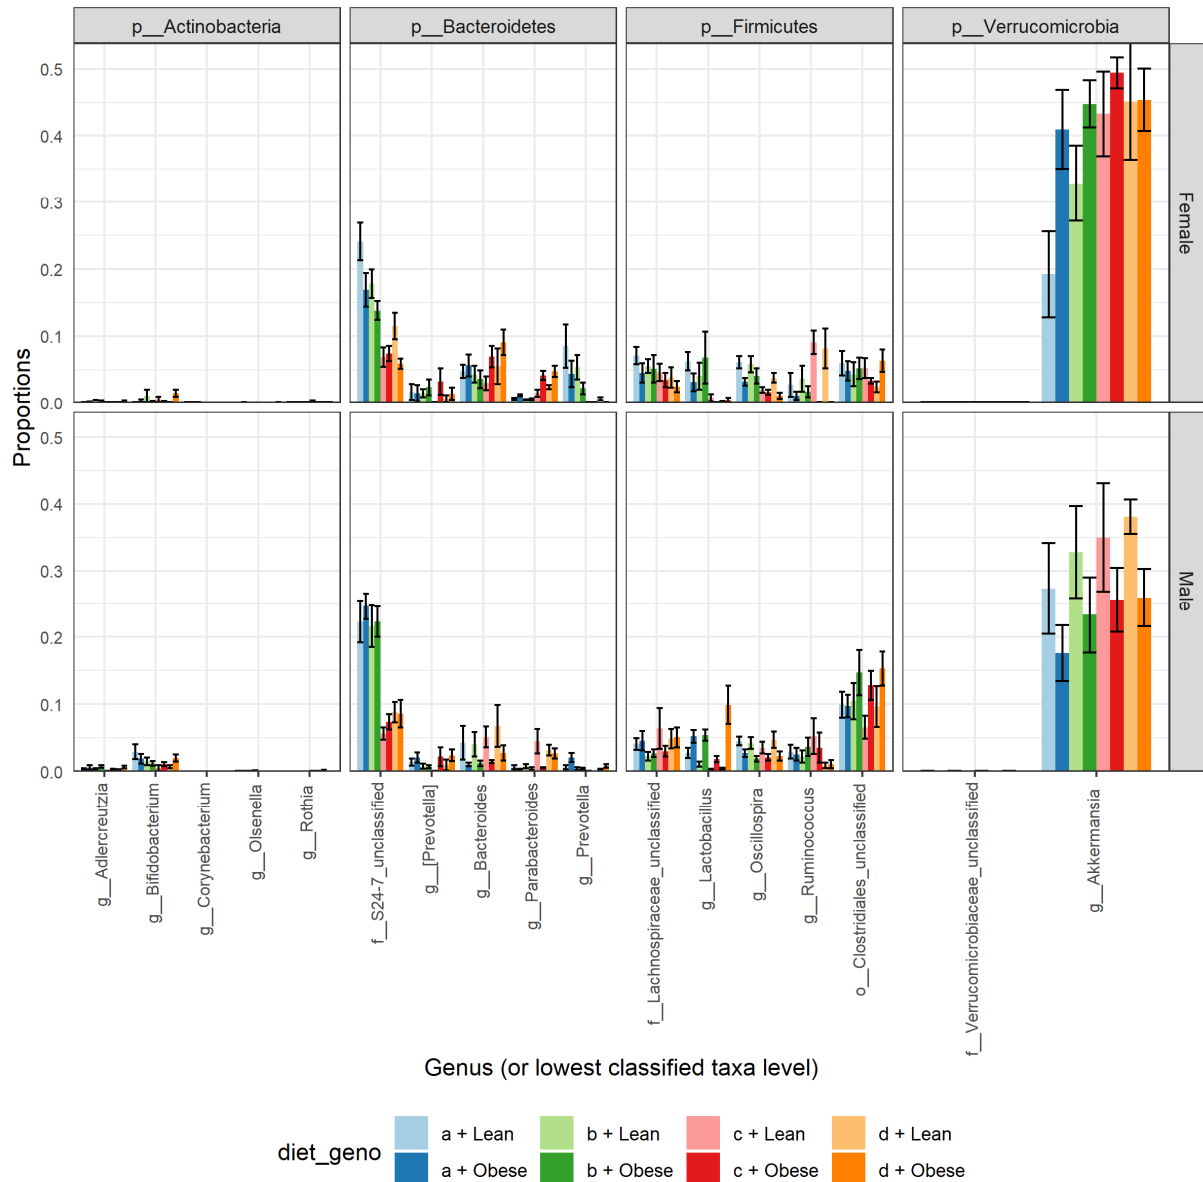

**Figure S3.** The plot illustrates the mean and standard error of the relative abundances of the 5 most abundant genus-level taxa within the 4 most abundant Phyla. The Genus-level plots are grouped according to Phylum along the x-axis. The groupings along the y-axis represent the sex column of metadata. The bar plot colors represent diet/genotype.

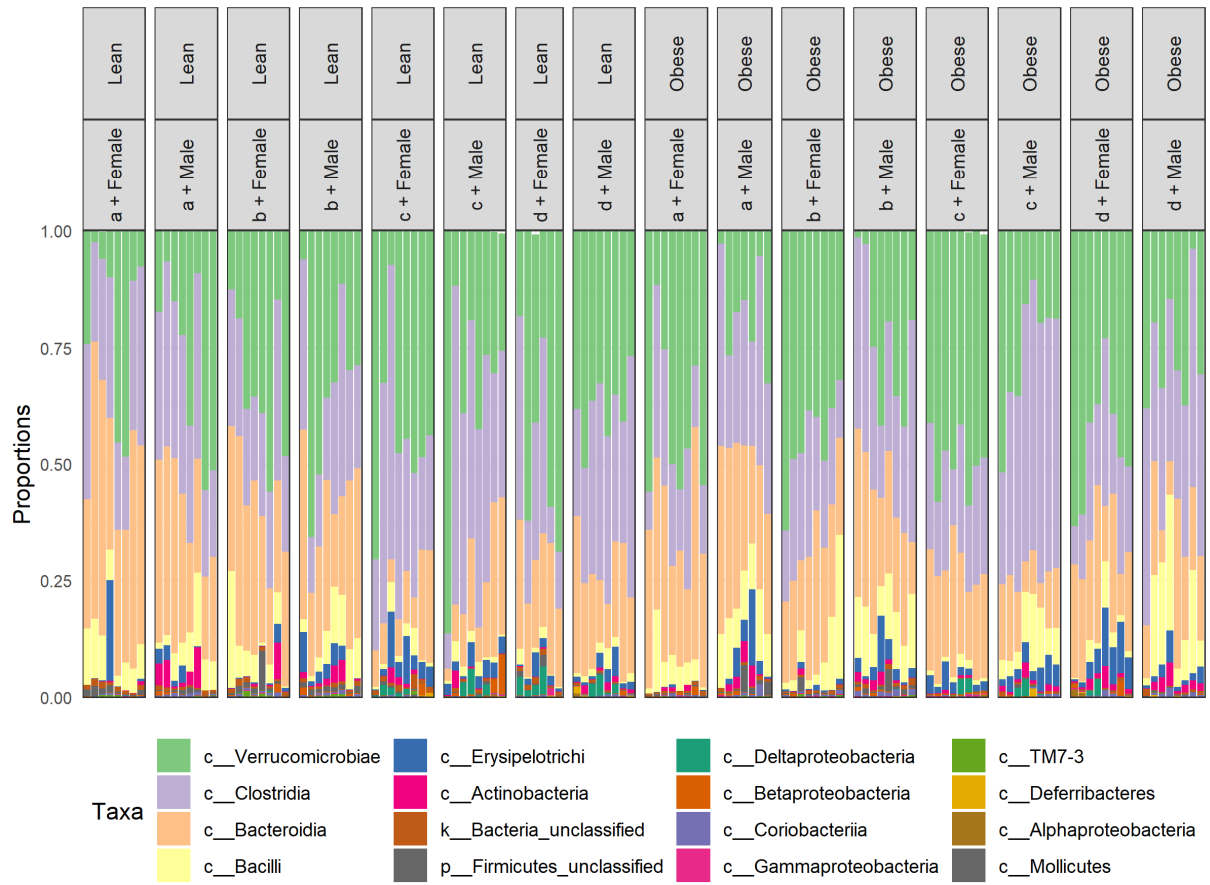

**Figure S4. Taxonomic composition at the class level.** The aggregated taxa were visualized at each taxonomic rank using the taxonomic bar plots. The unfilled portion of the bar plots represent lower-abundance taxa.



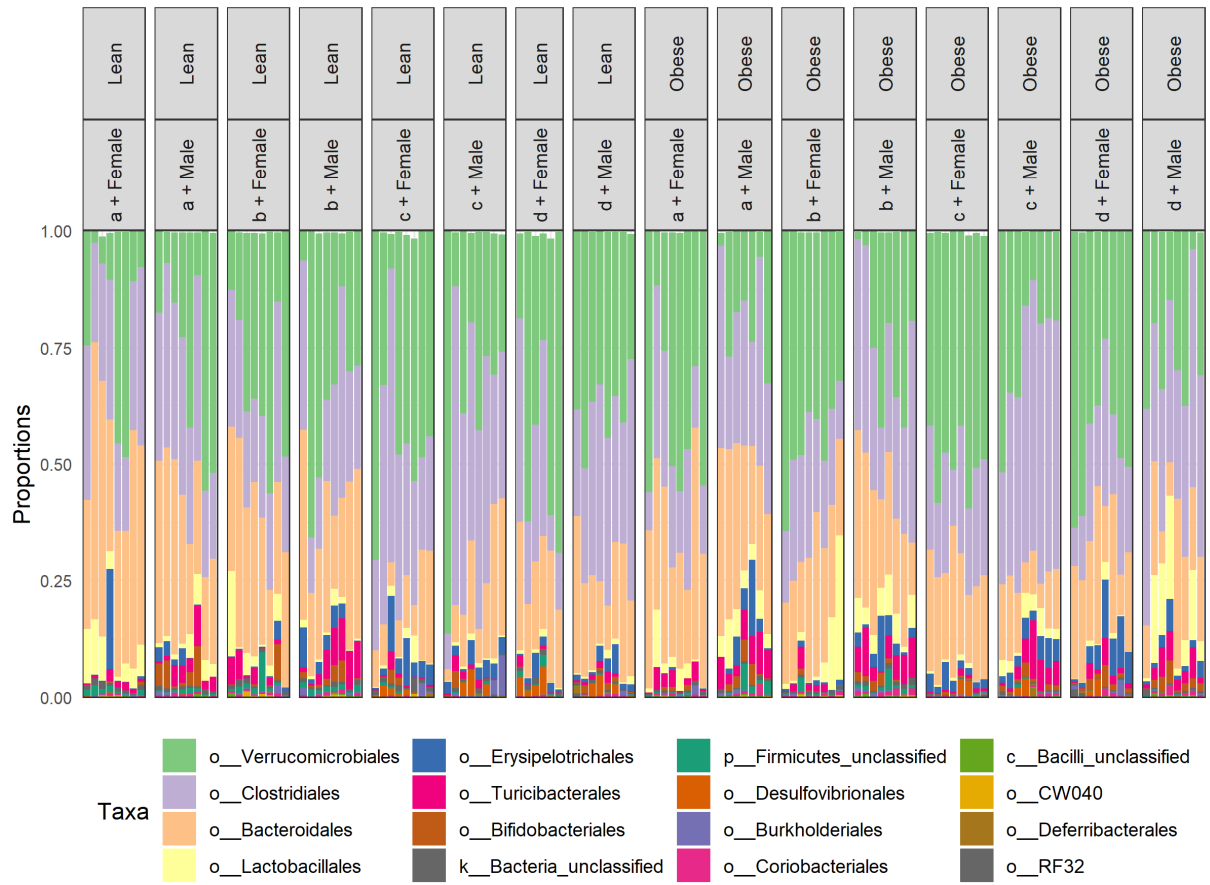

**Figure S5. Taxonomic composition at the order level.** The aggregated taxa were visualized at each taxonomic rank using the taxonomic bar plots. The unfilled portion of the bar plots represent lower-abundance taxa.

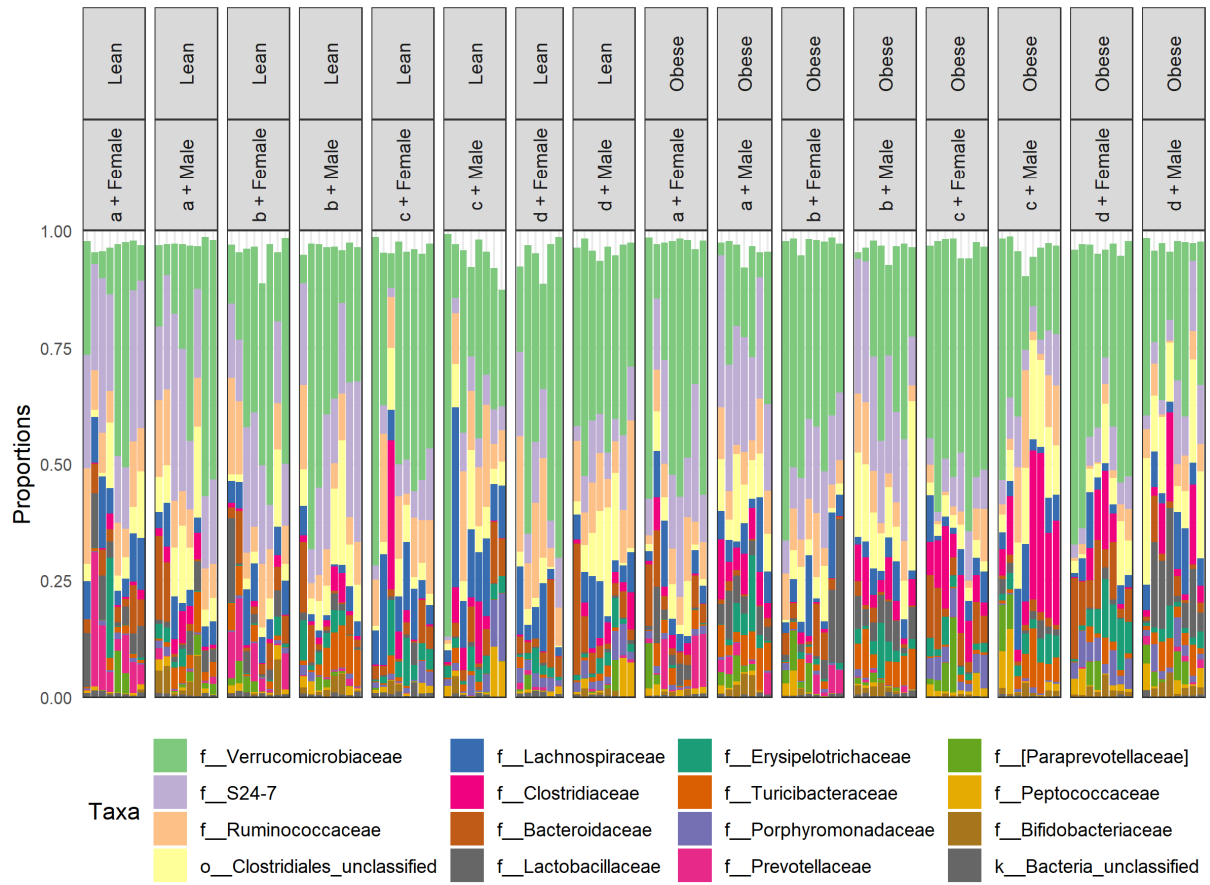

**Figure S6. Taxonomic composition at the family level.** The aggregated taxa were visualized at each taxonomic rank using the taxonomic bar plots. The unfilled portion of the bar plots represent lower-abundance taxa.

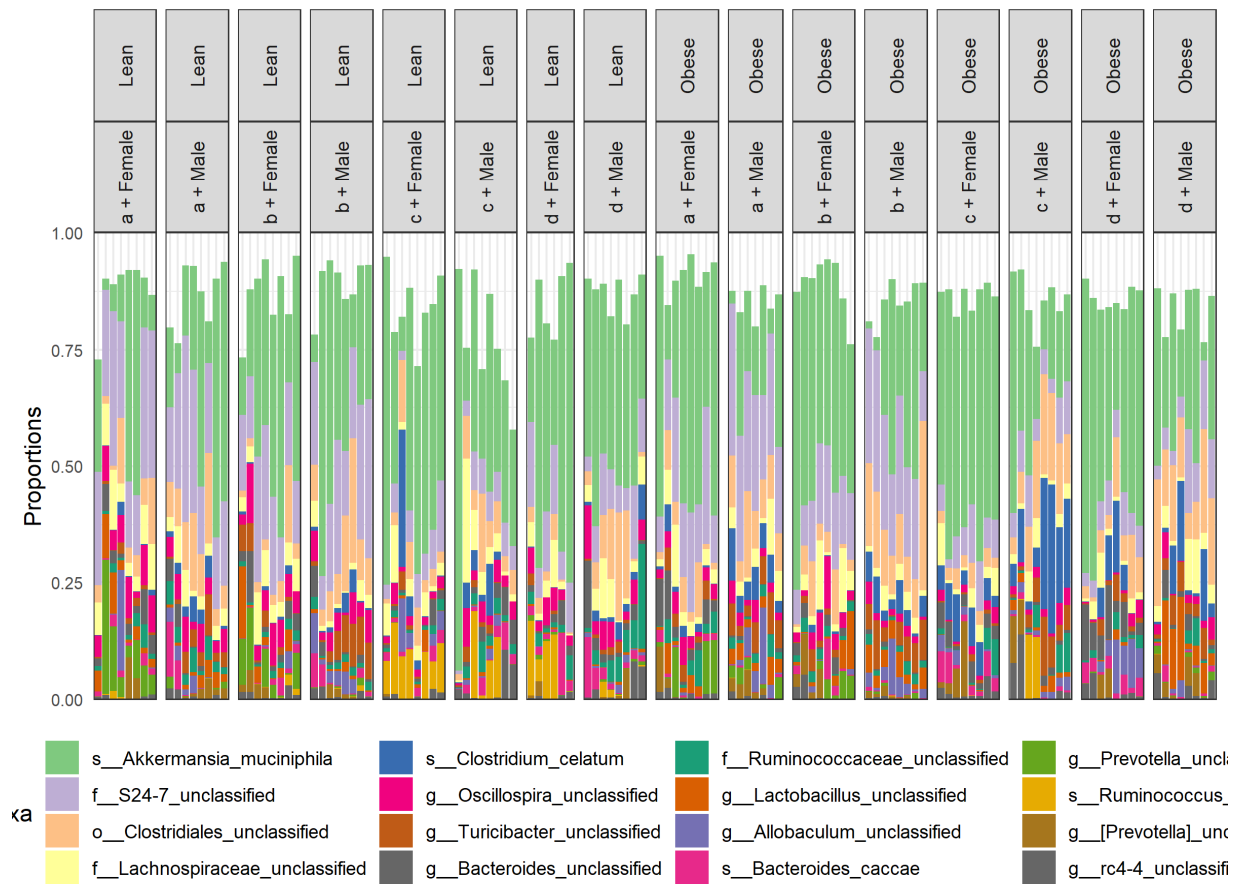

**Figure S7. Taxonomic composition at the species level.** The aggregated taxa were visualized at each taxonomic rank using the taxonomic bar plots. The unfilled portion of the bar plots represent lower-abundance taxa.

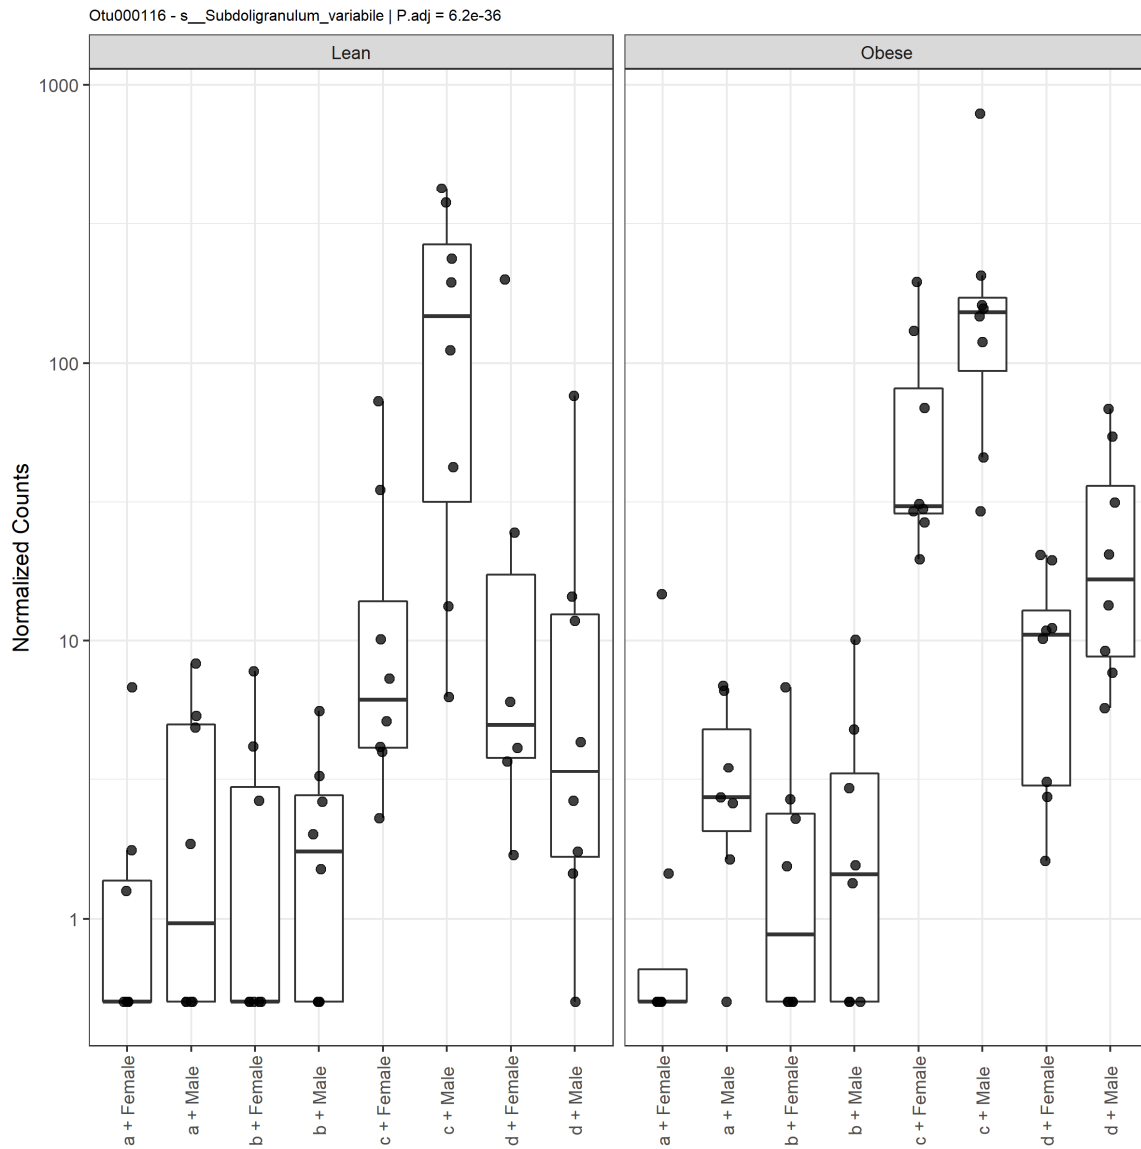

**Figure S8.** Differential abundance of *Subdoligranulum variabile* as a function of dietary interventions in lean and obese, male and female, JCR:LA cp rats fed a) control diet, b) control + flax, c) high fat, high sucrose or d) high fat, high sucrose + flax. N=8.

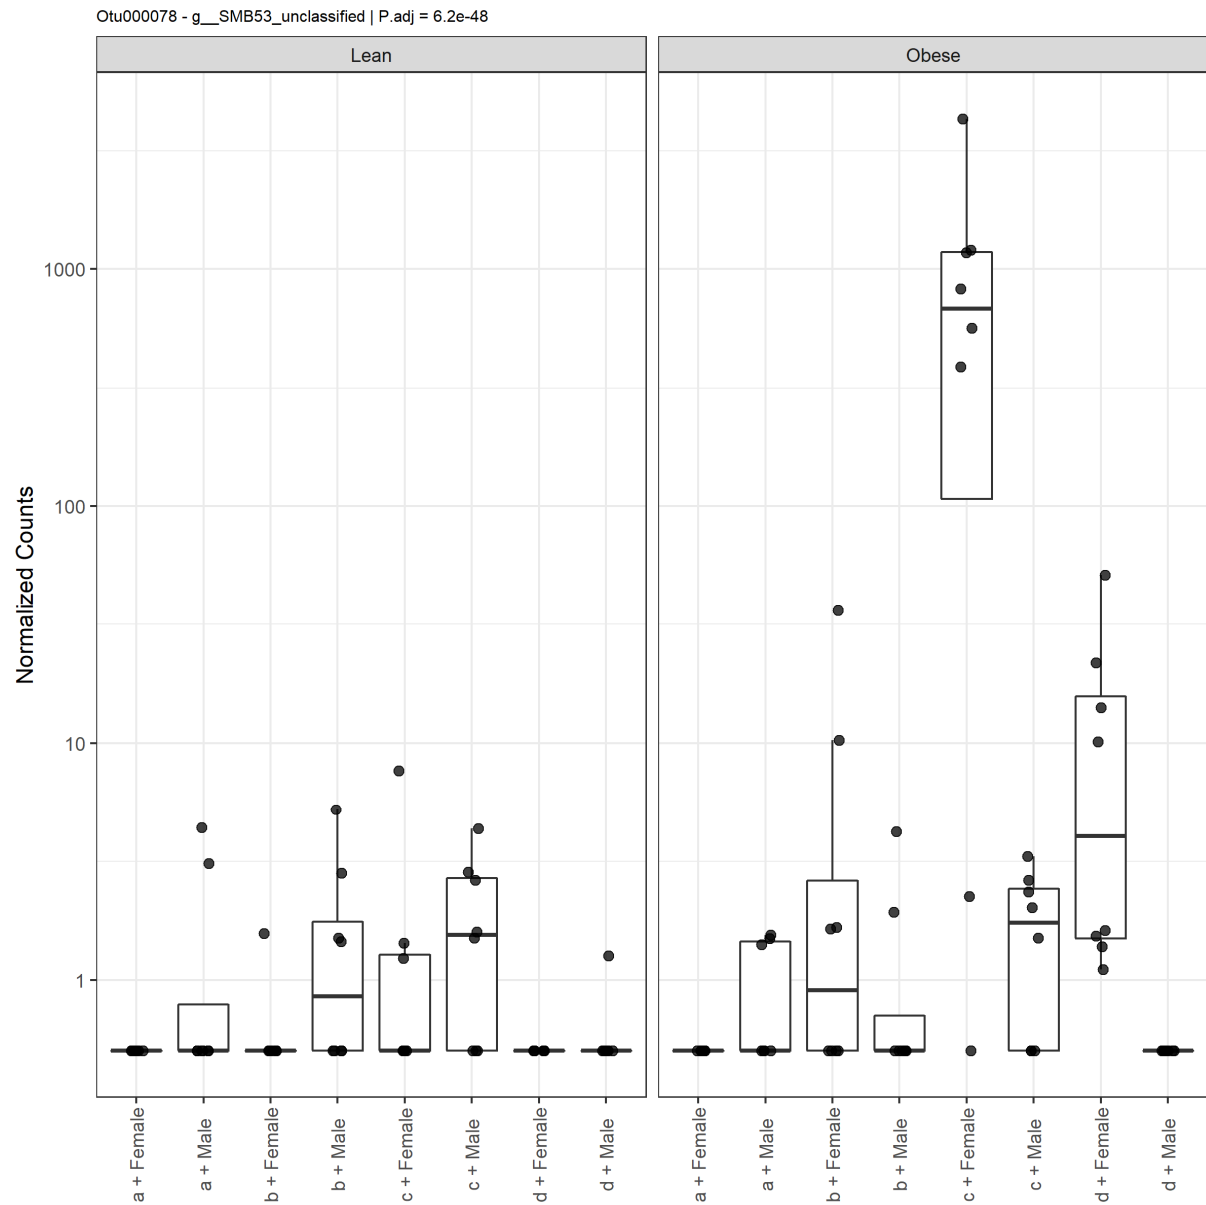

**Figure S9.** Differential abundance of a *SMB53* species as a function of dietary interventions in lean and obese, male and female, JCR:LA cp rats fed a) control diet, b) control + flax, c) high fat, high sucrose or d) high fat, high sucrose + flax. N=8.

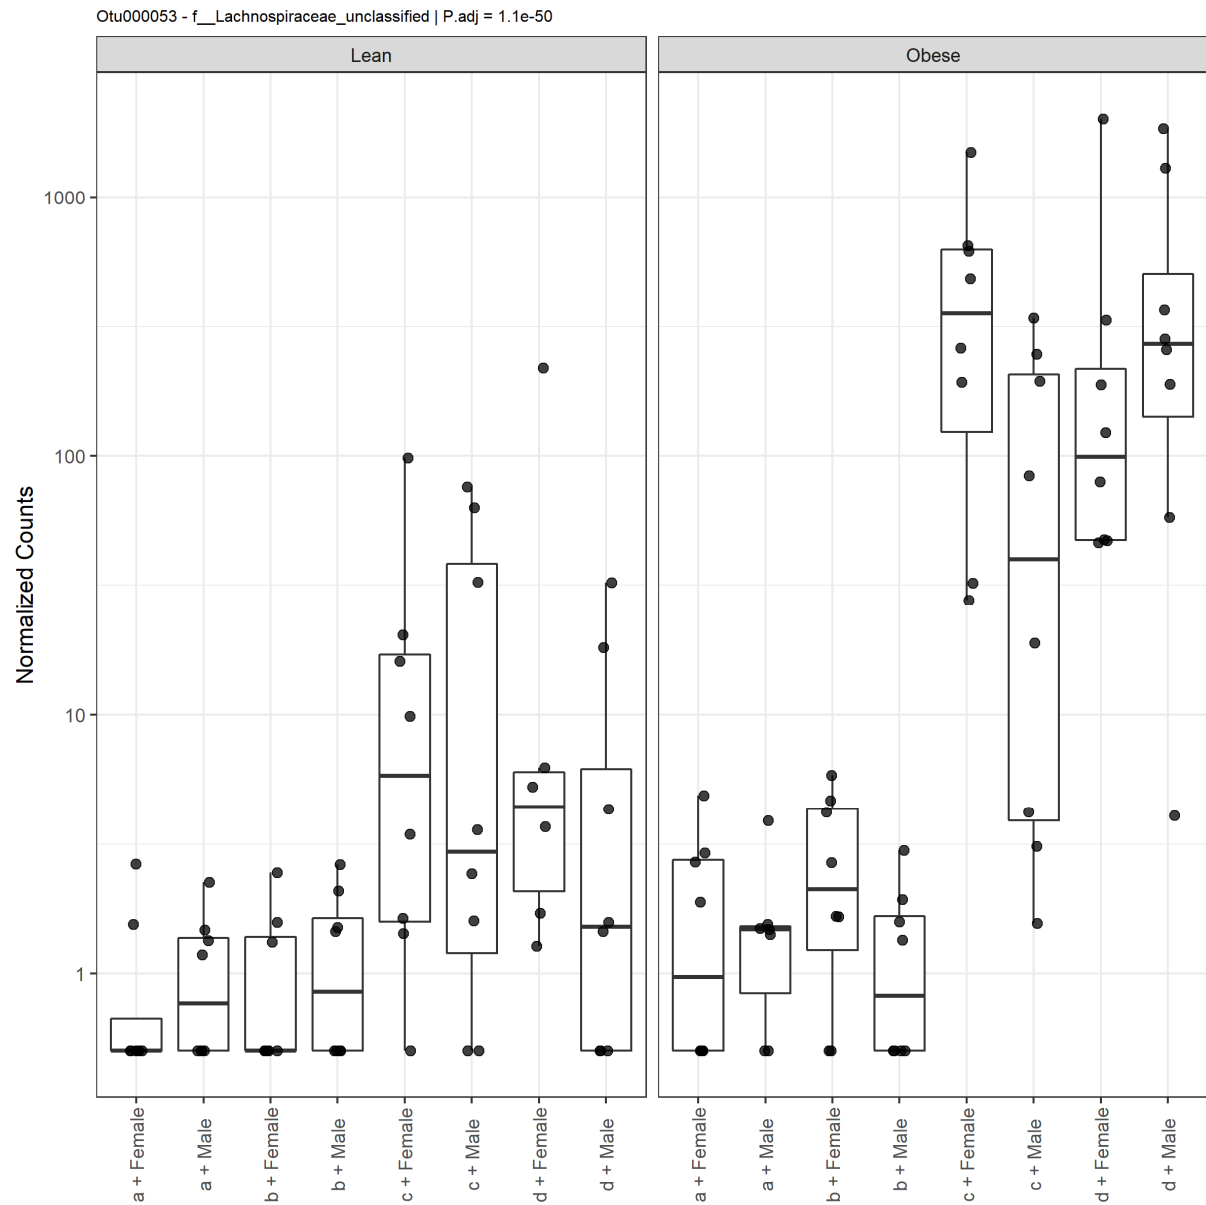

**Figure S10.** Differential abundance of an unclassified species from the family *Lachnospiraceae* as a function of dietary interventions in lean and obese, male and female, JCR:LA cp rats fed a) control diet, b) control + flax, c) high fat, high sucrose or d) high fat, high sucrose + flax. N=8.

**A.**

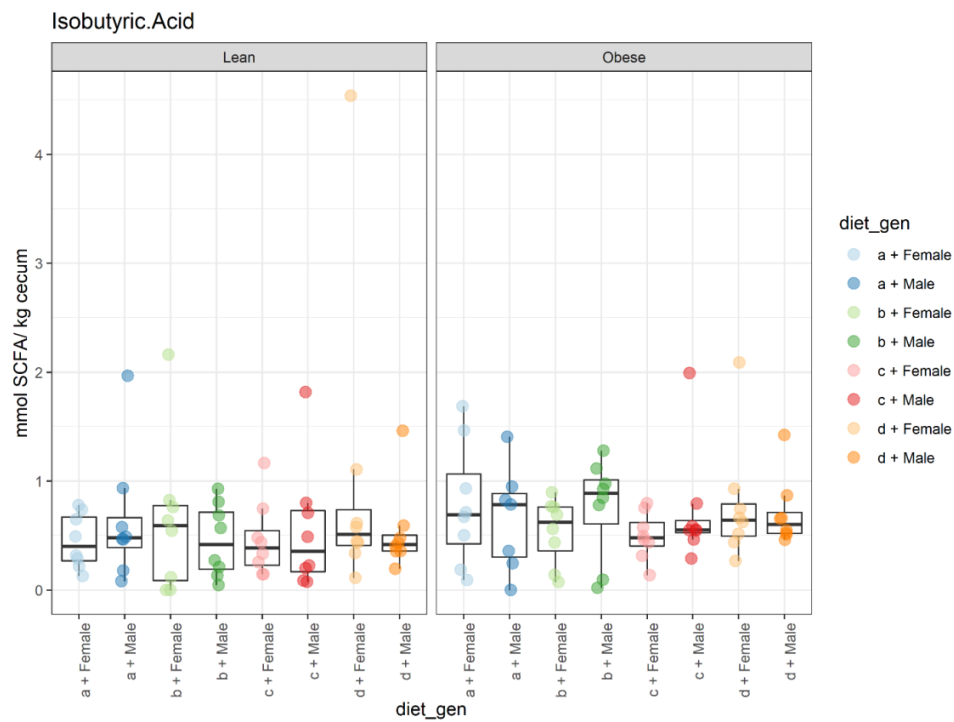

**B.**

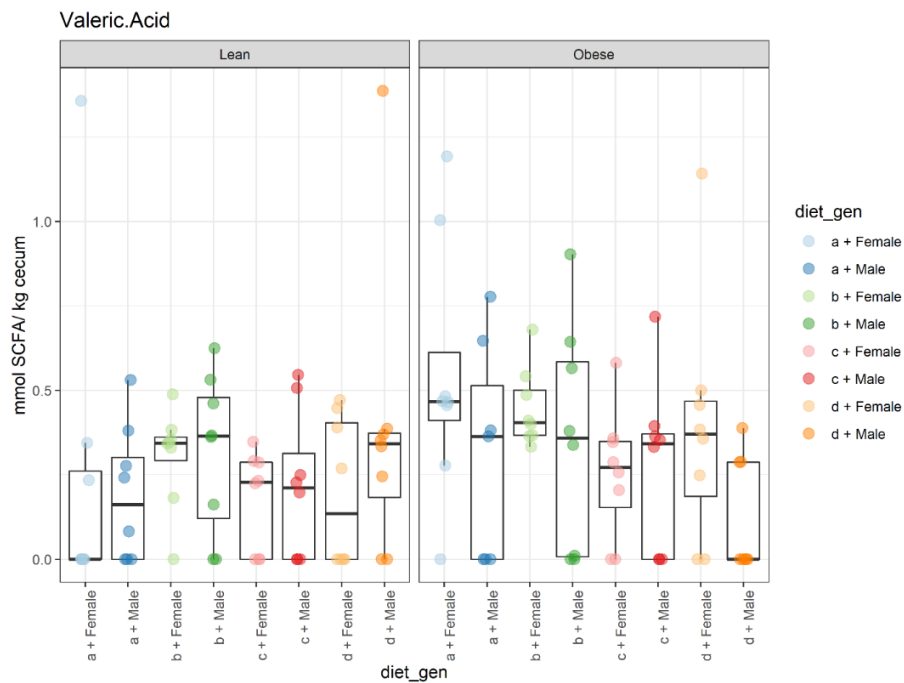

**Figure S11.** The effect of genotype, sex, and diet on the SCFA content. **A**, isobutyric acid levels; **B**, valeric acid levels.
